# Supplementary material for: The utilisation of regulated standardised care packages by Danish chiropractors: a mixed methods study
Source: Springer Nature journal article supplement (doi:10.1186/s12998-022-00423-7), 2022-03-08

## Additional file 2

Items of DIBQ questionnaire, related domains, and distribution of responses to individual items

Items, original DIBQ domain, and construct included in the modified DIBQ

| Domain number | Domains DIBQ               | Item number | Constructs           | Items                                                                                                                                     |
|---------------|----------------------------|-------------|----------------------|-------------------------------------------------------------------------------------------------------------------------------------------|
| D1            | Knowledge                  | 1           | Knowledge            | I know how to deliver standardised care packages.                                                                                         |
|               |                            | 2           | Role clarity         | Objectives of the standardised care packages and my role in this are clearly defined for me.                                              |
|               |                            | 3           | Role clarity         | With regard to the standardised care packages, I know what my responsibilities are.                                                       |
|               |                            | 4           | Role clarity         | In my work with the standardised care packages, I know exactly what is expected from me.                                                  |
| D2            | Skills                     | 5           | Skills               | I have the skills to deliver the standardised care packages.                                                                              |
| D3            | Professional role          | 6           | Professional role    | Delivering the standardised care packages is part of my work as a chiropractor.                                                           |
|               |                            | 7           | Professional role    | As a chiropractor, it is my job to deliver standardised care packages.                                                                    |
|               |                            | 8           | Professional role    | It is my responsibility as a chiropractor to deliver the standardised care packages.                                                      |
| D4            | Beliefs about capabilities | 9           | Self-efficacy        | I am confident that I can deliver the standardised care packages.                                                                         |
|               |                            | 10          | Self-efficacy        | I am confident that I can deliver the standardised care packages even when there is little time.                                          |
| D6            | Beliefs about consequences | 11          | Attitude             | For me, delivering the standardised care packages is (not useful at all – very useful).                                                   |
|               |                            | 12          | Attitude             | For me, delivering the standardised care packages is (not worthwhile at all – very worthwhile).                                           |
|               |                            | 13          | Outcome expectancies | If I deliver the standardised care packages according to the collective agreement, the standardised care packages will be most effective. |
|               |                            | 14          | Outcome expectancies | If I deliver the standardised care packages according to the collective agreement, participants will appreciate this.                     |

|     |                          |    |                            |                                                                                                                                                                                                                                                                          |
|-----|--------------------------|----|----------------------------|--------------------------------------------------------------------------------------------------------------------------------------------------------------------------------------------------------------------------------------------------------------------------|
|     |                          | 15 | Outcome expectancies       | If I deliver the standardised care packages according to the collective agreement, this will strengthen the collaboration with the general practitioners.                                                                                                                |
|     |                          | 16 | Outcome expectancies       | If I deliver the standardised care packages according to the collective agreement, it will help participants to be able to cope better with their back problems.                                                                                                         |
| D7  | Intentions               | 17 | Intentions                 | I will definitely deliver the standardised care packages in the next three months.                                                                                                                                                                                       |
| D8  | Goals                    | 18 | Priority                   | How often is working on something else on your agenda more urgent than delivering the standardised care packages? [Rephrased to fit answering options: <i>There is rarely something else on your agenda more urgent than delivering the standardised care packages</i> ] |
| D9  | Innovation               | 19 | Innovation characteristics | It is possible to tailor the standardised care packages to participants' needs.                                                                                                                                                                                          |
|     |                          | 20 | Innovation characteristics | It is possible to tailor the standardised care packages to the chiropractors' needs.                                                                                                                                                                                     |
|     |                          | 21 | Innovation characteristics | The standardised care packages cost little time to deliver.                                                                                                                                                                                                              |
|     |                          | 22 | Innovation characteristics | The standardised care packages are compatible with daily practice.                                                                                                                                                                                                       |
|     |                          | 23 | Innovation characteristics | The standardised care packages are simple to deliver.                                                                                                                                                                                                                    |
| D10 | Socio-political context  | 24 | Socio-political Context    | The government provides sufficient reimbursement to the standardised care packages.                                                                                                                                                                                      |
|     |                          | 25 | Socio-political Context    | Primary Health Care is sufficiently oriented towards the delivery of standardised care packages.                                                                                                                                                                         |
| D12 | Patient                  | 26 | Patient characteristics    | Patients are positive about the standardised care packages.                                                                                                                                                                                                              |
| D13 | Innovation strategy      | 27 | Innovation strategies      | There have been provided sufficient materials about the standardised care packages.                                                                                                                                                                                      |
| D17 | Behavioural regulation   | 28 | Action planning            | I have a clear plan for when I will deliver the standardised care packages.                                                                                                                                                                                              |
| D18 | Nature of the behaviours | 29 | Automaticity               | Delivering the standardised care packages is something I do automatically.                                                                                                                                                                                               |
|     |                          | 30 | Memory                     | Delivering standardised care packages is something I seldom forget.                                                                                                                                                                                                      |

Distribution of responses to individual items of the modified DIBQ

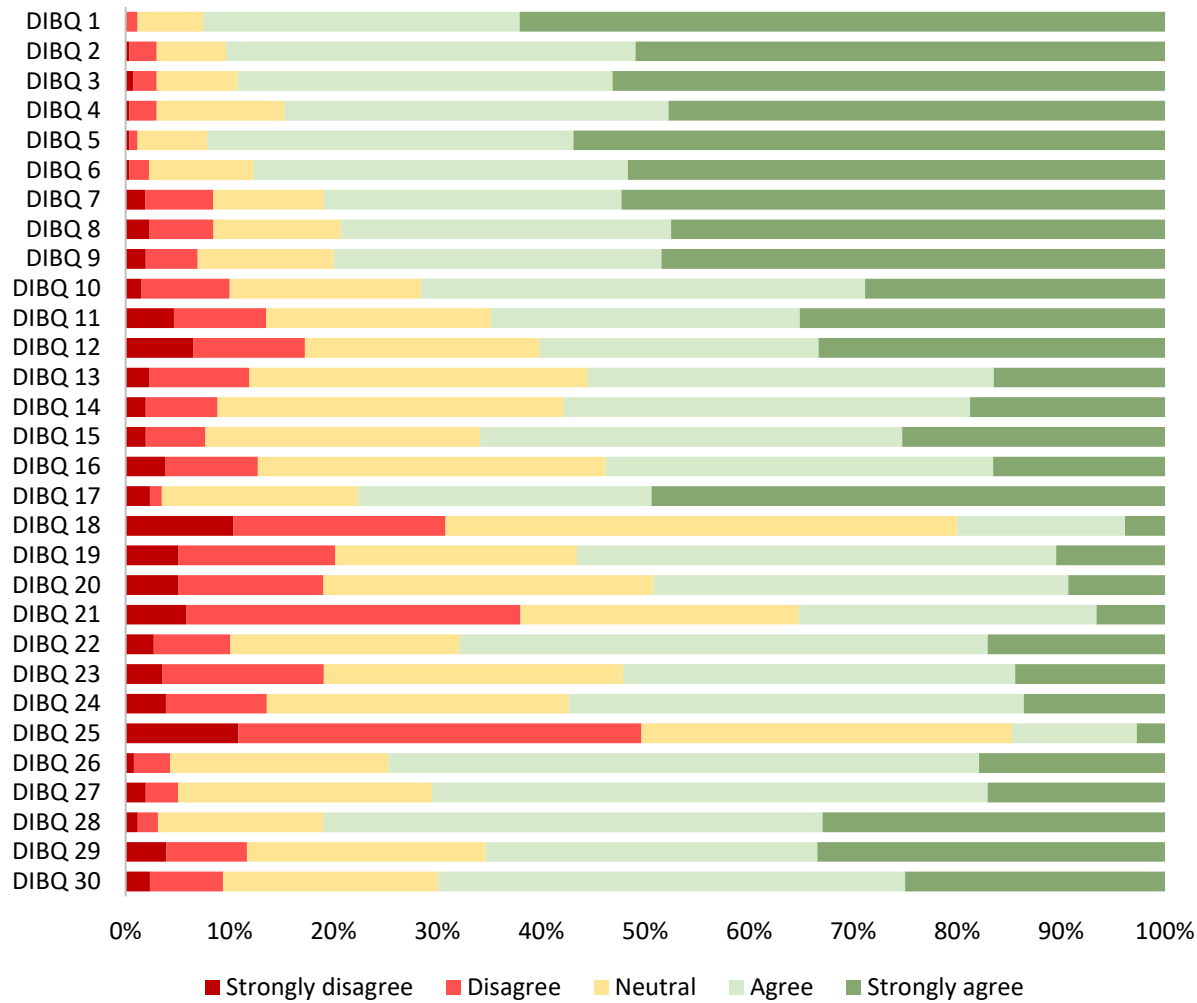

Supplement: MOESM2 [file 20202004]
